# Supplementary material for: Technical note: Space–time analysis of rainfall extremes in Italy: clues from a reconciled dataset
Source: Copernicus journal article supplement (doi:10.5194/hess-22-2705-2018), 2018-05-07

Kriged map of some characteristic of the annual maxima distribution in Italy extracted from the I-RED dataset and interpolated with ordinary kriging with exponential variogram in ArcMap.

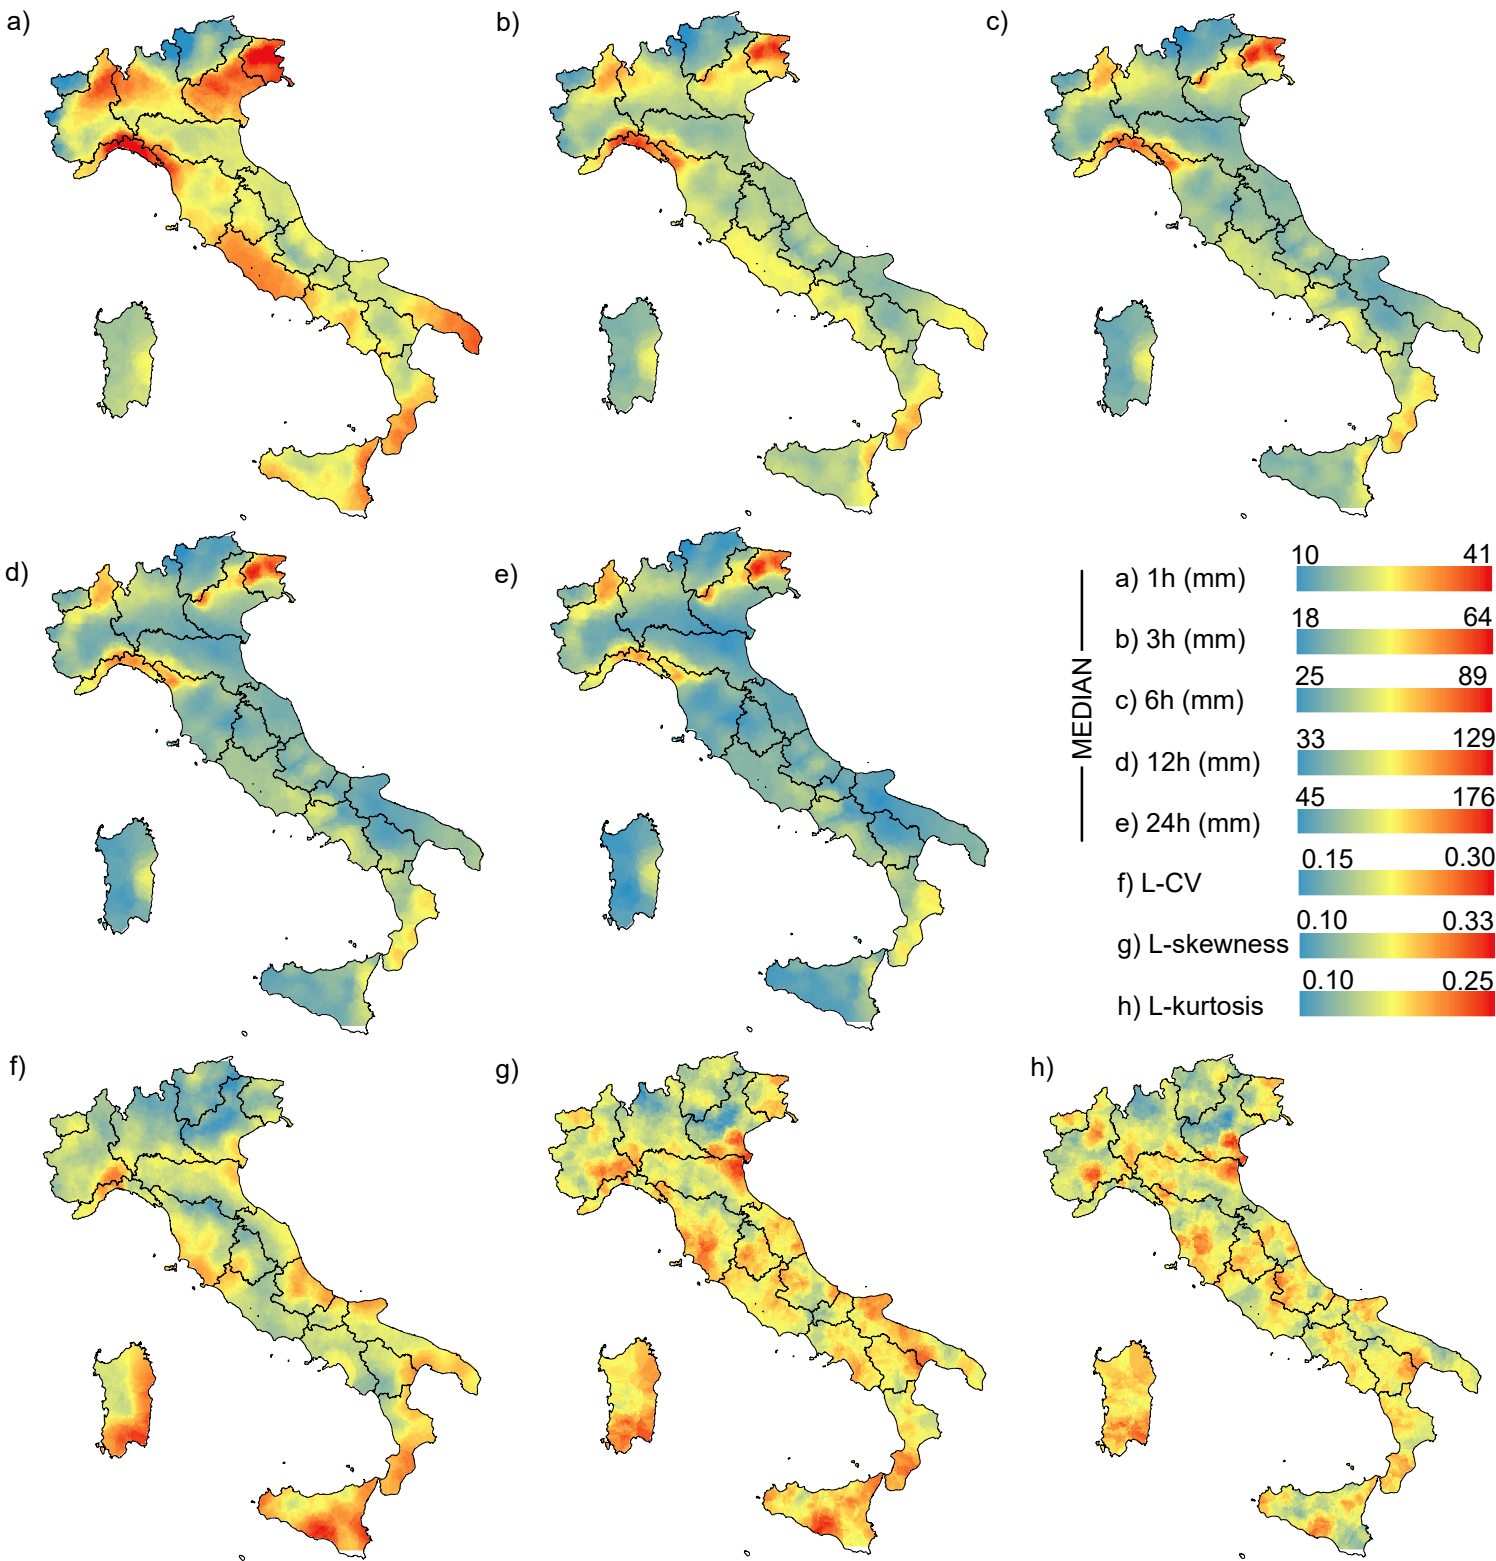

Supplement: Supplementary file 2 [file Suppementary_2_krigate.pdf › Suppementary_2_krigate.pdf]
