# Supplementary material for: Technical note: Space–time analysis of rainfall extremes in Italy: clues from a reconciled dataset
Source: Copernicus journal article supplement (doi:10.5194/hess-22-2705-2018), 2018-05-07
Supplement: Supplementary file [file hess-22-2705-2018-supplement-title-page.pdf › hess-22-2705-2018-supplement-title-page.pdf]

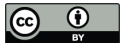

## *Supplement of*

# **Technical note: Space–time analysis of rainfall extremes in Italy: clues from a reconciled dataset**

**Andrea Libertino et al.**

*Correspondence to:* Andrea Libertino ([andrea.libertino@polito.it](mailto:andrea.libertino@polito.it))

- [hess-22-2705-2018-supplement-title-page.pdf](#)
- [Supplementary\\_1\\_L\\_moments.pdf](#)
- [Supplementary\\_2\\_krigate.pdf](#)

The copyright of individual parts of the supplement might differ from the CC BY 4.0 License.
