# Supplementary figures and images for: Technical note: Space–time analysis of rainfall extremes in Italy: clues from a reconciled dataset
Source: Copernicus journal article supplement (doi:10.5194/hess-22-2705-2018), 2018-05-07

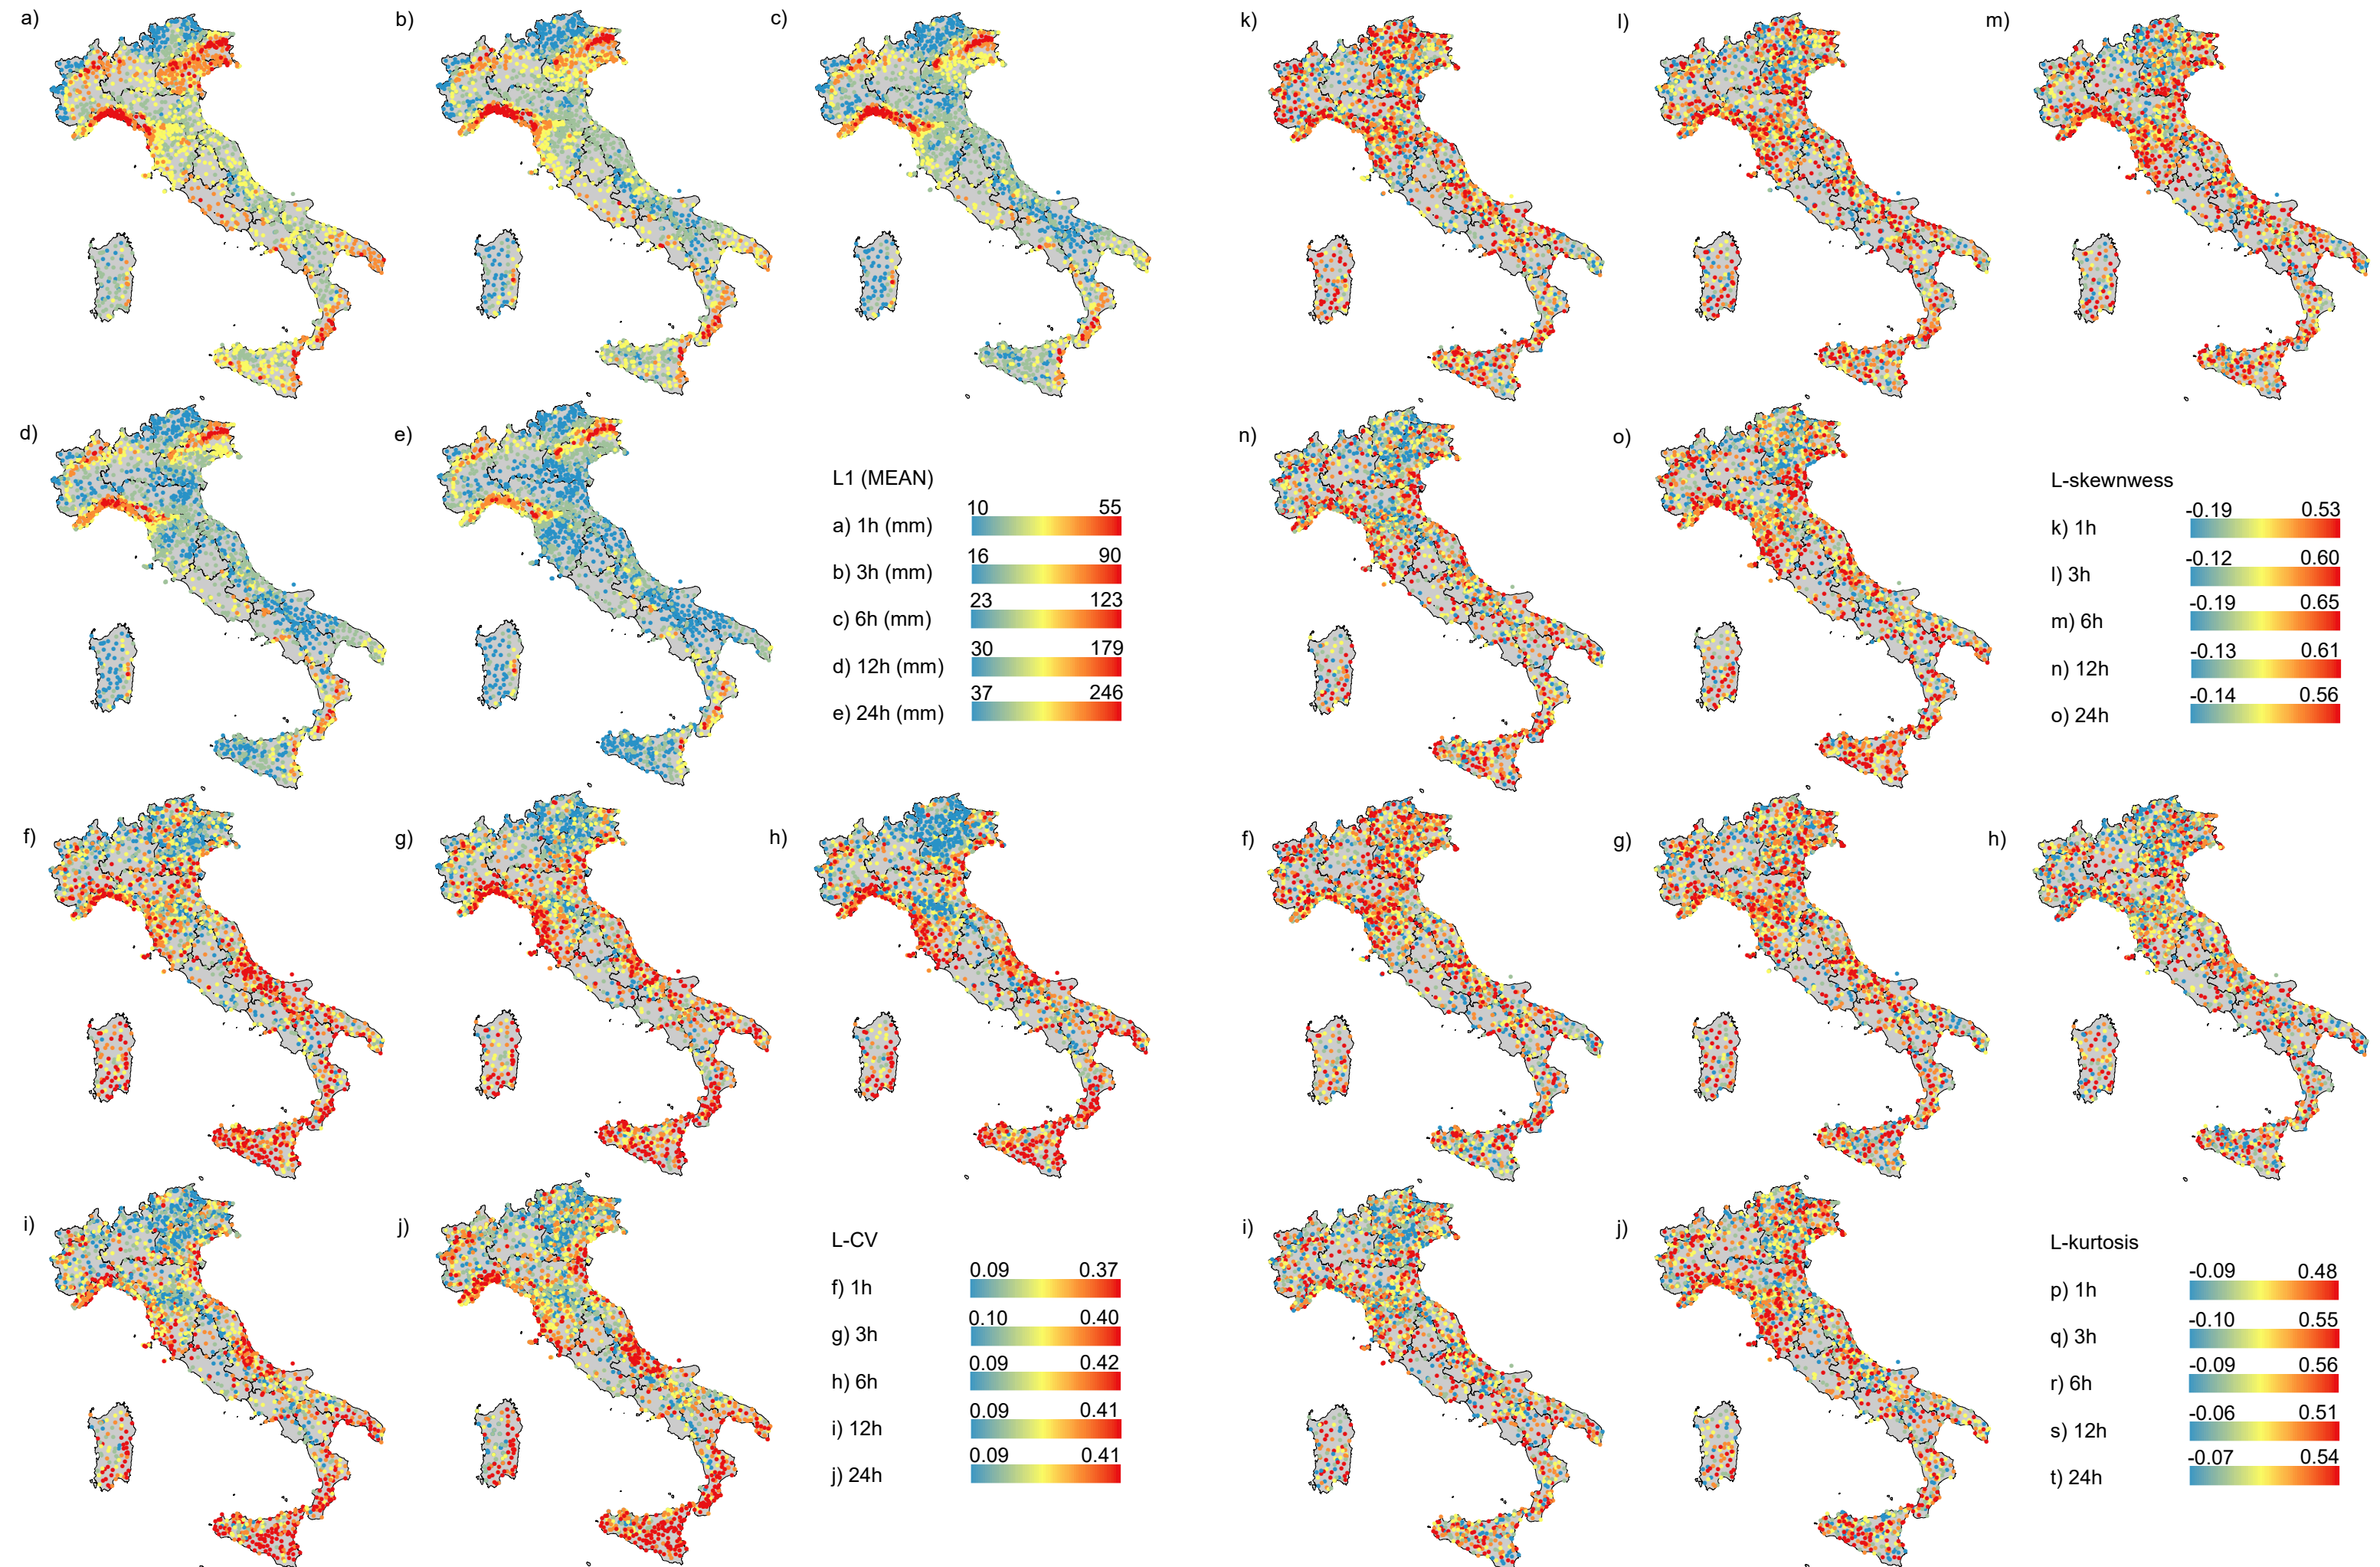

Supplement: Supplementary file 1 [file Suppementary_1_L_moments.pdf › Suppementary_1_L_moments.pdf]
